# Supplementary material for: Damage-induced pyroptosis drives endog thymic regeneration via induction of Foxn1 by purinergic receptor activation
Source: PubMed Central journal article supplement — bioRxiv. 2023 Jan 20:2023.01.19.524800. Preprint. [Version 1] doi: 10.1101/2023.01.19.524800 (PMC9882324; doi:10.1101/2023.01.19.524800), 2023-01-20

### **Supplementary Figure 1**

Thymuses from 6-8 week old C57BL/6 mice were harvested at days 0, 1, 2, 3 and 7 following TBI and glutathione levels were measured by flow cytometry in DP thymocytes (n=3 mice).

**Figure S1**

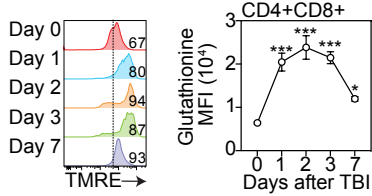

Supplement: NIHPP2023.01.19.524800v1-supplement-1.pdf [file NIHPP2023.01.19.524800v1-supplement-1.pdf]
